# Supplementary material for: Simultaneous analysis of polar and non-polar components of cell membrane phospholipids by GC-MS
Source: publisher site journal article supplement (doi:10.1515/chempap-2016-0073), 2016-01-01
Supplement: Supplementary file 1 [file chempap-2016-0073_supplement.docx]

**SUPPLEMENTARY DATA**

**Simultaneous analysis of polar and nonpolar components of cell membrane phospholipids by GC-MS**

**aVáclav M. Bierhanzl[[1]](#footnote-0)*, a,bMiroslava Bursová, aMartin Ston, a,bRadomír Čabala, cGabriela Seydlová**

a*Department of Analytical Chemistry, Faculty of Science, Charles University in Prague, Albertov 6, 128 43 Prague 2, Czech Republic*

b*Institute of Forensic Medicine and Toxicology, First Faculty of Medicine, Charles University in Prague and General University Hospital, U Nemocnice 2, 121 08 Prague 2, Czech Republic*

c*Department of Genetics and Microbiology, Faculty of Science, Charles University in Prague, Viničná 5, 128 44 Prague 2, Czech Republic*

Received 17 September 2015; Revised 10 March 2016; Accepted 11 March 2016


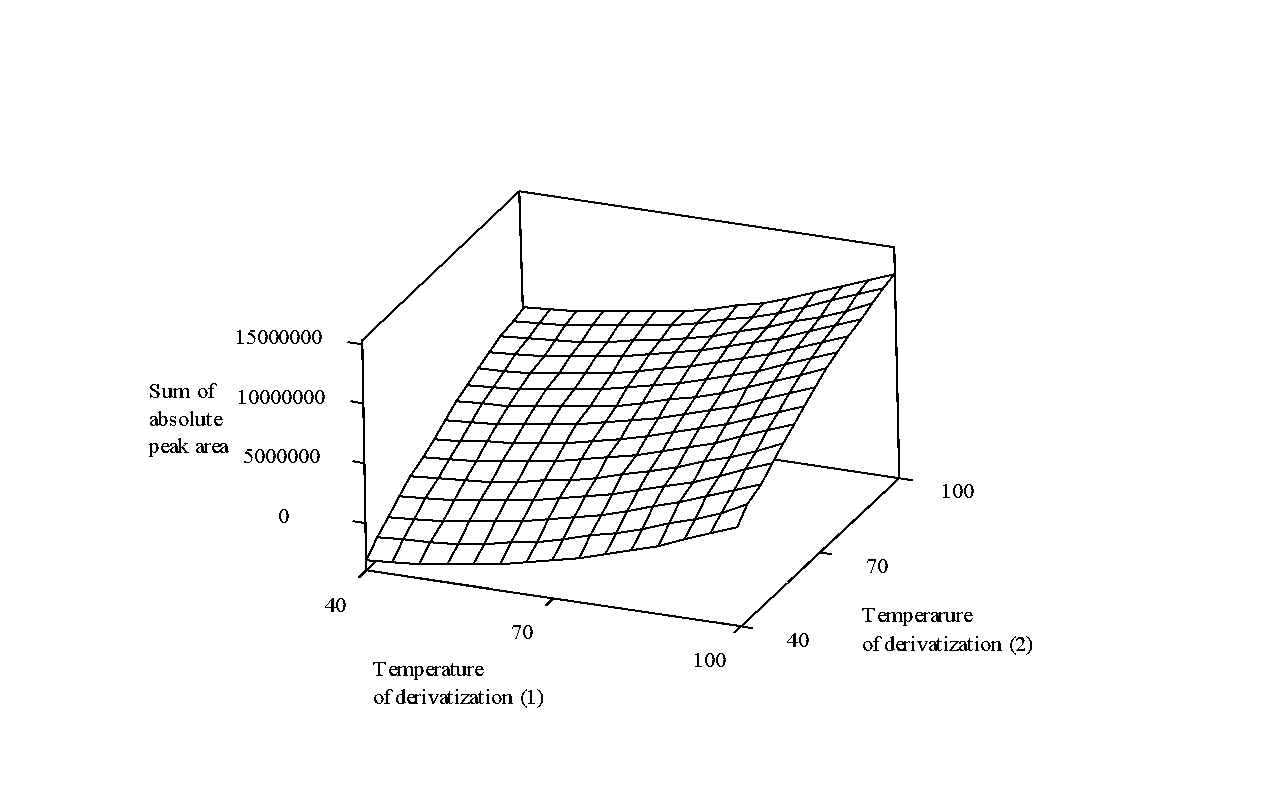


**Fig. S1.** Response surface plot showing the dependence of the sum of absolute peak areas on the temperature of derivatization (1) and on the temperature of derivatization (2).

**Table S1**. The values of coefficients of the second-order polynomial equation from the face-centered central composite design.

| Parameter | Coefficient |
| --- | --- |
| Constant… β0 | 240600953 |
| Linear |  |
| A…Ratio of reaction mixture of HDMS/ACN | -154134774 |
| B... Volume of reaction mixture of HDMS/ACN | -862070 |
| C... Volume of trifluoroacetic acid | -11343017 |
| D... Temperature of derivatization (1) | -8943.42 |
| E... Time of derivatization (1) | 1168342 |
| F... Volume of BSTFA | -515617 |
| G... Temperature of derivatization (2) | 2418097 |
| H... Time of derivatization (2) | 271871 |
|  |  |
| Square |  |
| A2 | 14281093 |
| B2 | 1089.22 |
| C2 | 5647313 |
| D2 | -3989.08 |
| E2 | -42862.6 |
| F2 | 994.942 |
| G2 | -22872.9 |
| H2 | -33832.6 |
|  |  |
| Interaction |  |
| CE | 3051.31 |
| CD | -28071.7 |
| DF | -14637.0 |
| DE | 5474.43 |
| GH | 1627.36 |

1. *Corresponding author, e-mail: ing.bierhanzl@gmail [↑](#footnote-ref-0)
